# Supplementary material for: Temporal-logic analysis of microglial phenotypic conversion with exposure to amyloid-β
Source: Royal Society of Chemistry journal article supplement (doi:10.1039/c4mb00457d), 2014-10-21
Supplement: c4mb00457d1.pdf [file c4mb00457d1.pdf]

## Supplementary Table

Table S1. Table of abbreviations. The name of each molecular species or cellular process is listed along with its abbreviation and the corresponding name of the element that represents it in the model. Each model element name is the same as the name used for it in the computer programs. Since the programming languages do not allow Greek characters they are replaced with lower-case Roman letters. To further distinguish model element names from actual molecule or cellular-process names they are rendered in `monotype` font. The # symbol in abbreviations or model element names stands for an arbitrary integer number. Abbreviations or model element names are not applicable (n/a) to items that are, respectively, not abbreviated in the text or do not appear in the current version of the model.

| Name                                                   | Abbreviation         | Model element |
|--------------------------------------------------------|----------------------|---------------|
| acetylcholine                                          | ACh                  | ACh           |
| adaptor protein 1                                      | AP1                  | AP1           |
| Alzheimer Disease                                      | AD                   | n/a           |
| amyloid- $\beta$                                       | A $\beta$            | Ab            |
| Arginase 1                                             | Arg1                 | Arg1          |
| $\alpha$ 6 $\beta$ 1 integrin                          | $\alpha$ 6 $\beta$ 1 | a6b1          |
| $\alpha$ 7 nicotinic acetylcholine receptor            | $\alpha$ 7nAChR      | a7nAChR       |
| c-Jun N terminal kinase                                | JNK                  | JNK           |
| cluster of differentiation #                           | CD#                  | CD#           |
| cluster of differentiation # ligand                    | CD#L                 | CD#L          |
| cluster of differentiation # receptor                  | CD#R                 | CD#R          |
| cytochrome C oxygenase #                               | COX#                 | COX#          |
| cytoskeleton                                           | n/a                  | cyto          |
| docking protein #                                      | Dok#                 | Dok#          |
| DNA-X adaptor protein 12                               | DAP12                | DAP12         |
| E prostanoid receptor 2                                | EP2                  | EP2           |
| extracellular signal-related kinase                    | ERK                  | ERK           |
| fibrillar A $\beta$                                    | fA $\beta$           | n/a           |
| forkhead box protein O                                 | FOXO                 | FOXO          |
| fractalkine                                            | CX3CL1               | CX3CL1        |
| fractalkine receptor                                   | CX3CR1               | CX3CR1        |
| growth factor receptor binding protein 2               | GRB2                 | GRB2          |
| G protein q                                            | Gq                   | Gq            |
| GTPase-activating protein                              | GAP                  | GAP           |
| hydrogen sulfide                                       | H2S                  | n/a           |
| inducible nitric oxide synthase                        | iNOS                 | iNOS          |
| inhibitor of $\kappa$ B                                | I $\kappa$ B         | I $\kappa$ B  |
| inhibitor of $\kappa$ B kinase                         | IKK                  | IKK           |
| IL1 receptor-associated kinase                         | IRAK                 | IRAK          |
| insulin receptor                                       | IR                   | n/a           |
| insulin receptor insulin-like growth factor 1 receptor | IRIGF1R              | IRIGF1R       |
| insulin-like growth factor 1                           | IGF1                 | IGF1          |
| insulin-like growth factor # receptor                  | IGF#R                | IGF#R         |
| interferon $\gamma$                                    | IFN $\gamma$         | IFN $\gamma$  |
| interferon receptor                                    | IFNR                 | IFNR          |

|                                                                                  |               |               |
|----------------------------------------------------------------------------------|---------------|---------------|
| interleukin 1 $\beta$                                                            | IL1 $\beta$   | IL1b          |
| interleukin #                                                                    | IL#           | IL#           |
| interleukin # receptor                                                           | IL#R          | IL#R          |
| interleukin 1 receptor antagonist                                                | IL1Ra         | IL1Ra         |
| Janus kinase #                                                                   | JAK#          | JAK#          |
| lipopolysaccharide                                                               | LPS           | LPS           |
| liver tyrosine kinase                                                            | Lyn           | Lyn           |
| liver X receptor $\beta$                                                         | LXR $\beta$   | LXRb          |
| MAPK/ERK kinase                                                                  | MEK           | MEK           |
| mitogen-activated protein kinase                                                 | MAPK          | MAPK          |
| mitogen-activated protein # kinase                                               | MAP#K         | MAP#K         |
| myeloid differentiation primary response protein                                 | MyD88         | MyD88         |
| nicotinamide adenine dinucleotide phosphate (reduced)                            | NADPH         | NADPH         |
| nitric oxide                                                                     | NO            | NO            |
| non-steroidal anti-inflammatory drugs                                            | NSAIDs        | n/a           |
| nuclear factor $\kappa$ B                                                        | NF $\kappa$ B | NF $\kappa$ B |
| peroxisome proliferator-activated receptor $\gamma$                              | PPAR $\gamma$ | PPAR $\gamma$ |
| phagocytosis                                                                     | n/a           | phago         |
| phosphoinositide 3 kinase                                                        | PI3K          | PI3K          |
| prostaglandin E 2                                                                | PGE2          | PGE2          |
| protein 38 mitogen-activated protein kinase                                      | p38MAPK       | p38MAPK       |
| protein kinase B                                                                 | Akt           | Akt           |
| protein kinase C                                                                 | PKC           | PKC           |
| phosphatidylinositol 3 kinase                                                    | PI3K          | PI3K          |
| Rac member of the Rho family of GTPases                                          | Rac           | Rac           |
| Ras member of the Rho family of GTPases                                          | Ras           | Ras           |
| reactive oxygen species                                                          | ROS           | ROS           |
| receptor-interacting protein 1                                                   | RIP1          | RIP1          |
| retinoic acid                                                                    | n/a           | retino        |
| retinoid X receptor                                                              | RXR           | RXR           |
| rosiglitazone                                                                    | n/a           | rosi          |
| sarcoma homology domain 2-containing inositol phosphatase 1                      | SHIP1         | SHIP1         |
| scavenger receptor A                                                             | SRA           | SRA           |
| signal transducer and activator of transcription #                               | STAT#         | STAT#         |
| Sma and Mad proteins from <i>C. elegans</i> and <i>Drosophila</i> , respectively | Smad          | Smad          |
| spleen tyrosine kinase                                                           | Syk           | Syk           |
| superoxide dismutase                                                             | SOD           | SOD           |
| Toll-like receptor #                                                             | TLR#          | TLR#          |
| Toll/interleukin 1 receptor (TIR)-domain-containing adaptor-inducing             | TRIF          | TRIF          |
| interferon $\beta$                                                               |               |               |
| TNF receptor-associated factor 6                                                 | TRAF6         | TRAF6         |
| transforming growth factor $\beta$                                               | TGF $\beta$   | TGFb          |
| transforming growth factor-associated kinase 1                                   | TAK1          | TAK1          |
| transforming growth factor receptor                                              | TGFR          | TGFR          |
| triggering receptor expressed on myeloid cells 2                                 | TREM2         | TREM2         |
| triggering receptor expressed on myeloid cells 2 ligand                          | TREM2L        | TREM2L        |
| tumor necrosis factor $\alpha$                                                   | TNF $\alpha$  | TNFa          |
| tumor necrosis factor receptor                                                   | TNFR          | TNFR          |
| Vav guanine nucleotide exchange factor                                           | Vav           | Vav           |
| Ym1 chitinase-like protein                                                       | Ym1           | Ym1           |
